# Supplementary material for: Computational screening of homo and hetero transition metal dimer catalysts for reduction of CO2 to C2 products with high activity and low limiting potential
Source: Royal Society of Chemistry journal article supplement (doi:10.1039/d0ta05212d), 2020-01-01
Supplement: d0ta05212d1.pdf [file d0ta05212d1.pdf]

**Electronic Supplementary Information for**

**Computational Screening of Homo and Hetero  
Transition Metal Dimer Catalysts for Reduction  
of CO<sub>2</sub> to C<sub>2</sub> Products with High Activity and  
Low Limiting Potential**

**Dachang Chen<sup>a,b</sup>, Zhiwen Chen<sup>b</sup>, Zhuole Lu<sup>b</sup>, , Ju Tang<sup>a</sup>, Xiaoxing Zhang<sup>a,d\*</sup>, Chandra  
Veer Singh<sup>b,c\*</sup>**

<sup>a</sup> School of Electrical Engineering and Automation, Wuhan University, Wuhan 430072, China

<sup>b</sup> Department of Materials Science and Engineering, University of Toronto, Toronto, Ontario,  
M5S 3E4, Canada

<sup>c</sup> Department of Mechanical and Industrial Engineering, University of Toronto, Toronto,  
Ontario, M5S 3G8, Canada

<sup>d</sup> Hubei Key Laboratory for High-efficiency Utilization of Solar Energy and Operation  
Control of Energy Storage System, Hubei University of Technology, Wuhan 430068, China

\*Corresponding author, E-mail: [xiaoxing.zhang@outlook.com](mailto:xiaoxing.zhang@outlook.com);  
[chandraveer.singh@utoronto.ca](mailto:chandraveer.singh@utoronto.ca)

## Table of Content

|                                                                                                                                                                                                                             |     |
|-----------------------------------------------------------------------------------------------------------------------------------------------------------------------------------------------------------------------------|-----|
| <b>Figures</b> .....                                                                                                                                                                                                        | S4  |
| Figure S1. The adsorption free energy of *H, *OH and *CO against various C <sub>2</sub> related intermediates. ....                                                                                                         | S4  |
| Figure S2. The pathway for CRR to C <sub>2</sub> products on Cr-Fe based DAC with the minimum limiting potential. The calculated free energies are all at U= 0 V versus RHE.....                                            | S5  |
| Figure S3. The pathway for CRR to C <sub>2</sub> products on Cr-Cu based DAC with the minimum limiting potential. The calculated free energies are all at U= 0 V versus RHE. ....                                           | S6  |
| Figure S4. The pathway for CRR to C <sub>2</sub> products on Mn-Cu based DAC with the minimum limiting potential. The calculated free energies are all at U= 0 V versus RHE. ....                                           | S7  |
| Figure S5. The pathway for CRR to C <sub>2</sub> products on Fe-Fe based DAC with the minimum limiting potential. The calculated free energies are all at U= 0 V versus RHE. ....                                           | S8  |
| Figure S6. The pathway for CRR to C <sub>2</sub> products on Fe-Co based DAC with the minimum limiting potential. The calculated free energies are all at U= 0 V versus RHE. ....                                           | S9  |
| Figure S7. The pathway for CRR to C <sub>2</sub> products on Co-Co based DAC with the minimum limiting potential. The calculated free energies are all at U= 0 V versus RHE. ....                                           | S10 |
| Figure S8. The pathway for CRR to C <sub>2</sub> products on Co-Ni based DAC with the minimum limiting potential. The calculated free energies are all at U= 0 V versus RHE. ....                                           | S11 |
| Figure S9. The pathway for CRR to C <sub>2</sub> products on Co-Cu based DAC with the minimum limiting potential. The calculated free energies are all at U= 0 V versus RHE. ....                                           | S12 |
| Figure S10. The pathway for CRR to C <sub>2</sub> products on Ni-Cu based DAC with the minimum limiting potential. The calculated free energies are all at U= 0 V versus RHE. ....                                          | S13 |
| Figure S11. The reaction diagrams of CRR on other DACs. The value larger than +0.8 eV means that the corresponding reaction is difficult to happen.....                                                                     | S14 |
| Figure S12. Comparison of energy barriers between the coupling process and protonation process on DACs, and the relationship with the descriptors.....                                                                      | S15 |
| Figure S13. Configurations of protonation process of *CO-CHO or *CO-CO on DACs (LH mechanism).....                                                                                                                          | S16 |
| Figure S14. Protonation process of *CO-CHO or *CO-CO on DACs (ER mechanism) at applied potential.....                                                                                                                       | S17 |
| <b>Tables</b> .....                                                                                                                                                                                                         | S18 |
| Table S1. Average binding energies (eV) of metal atoms for TM <sub>2</sub> N <sub>6</sub> -graphene system and average cohesive energy in bulk metals for doped two metal atoms.....                                        | S18 |
| Table S2. The values of thermal correction containing the zero-point energy, the enthalpic correction, and the entropy correction of the relevant molecules, and the adsorbed species. The temperature is set as 298 K..... | S19 |
| Table S3. Values of G(*H), G(*OH) on various of DACs (the yellow background means that the DAC is excluded for CRR) and magnetic moments.....                                                                               | S20 |
| Table S4. Values of G(*COOH), G(*CO) on various of DACs and magnetic moments.....                                                                                                                                           | S21 |
| Table S5. Values of G(*CHO), G(*COH) on various of DACs and magnetic moments.....                                                                                                                                           | S22 |
| Table S6. Values of G(*CO-CO), G(*CO-CHO) and G(*CO-COH) on various of DACs and magnetic moments.....                                                                                                                       | S23 |

|                                                                                                                                                                                                                                                                                                                      |     |
|----------------------------------------------------------------------------------------------------------------------------------------------------------------------------------------------------------------------------------------------------------------------------------------------------------------------|-----|
| Table S7. Values of G(*COCO), G(*COCHO) and G(*COCOH) on various of DACs and magnetic moments.....                                                                                                                                                                                                                   | S24 |
| Table S8. Values of G(*COCH <sub>2</sub> O), G(*COHCHO), G(*COHCH <sub>2</sub> O), G(*CHOHCH <sub>2</sub> O), G(*CHCH <sub>2</sub> O), G(*CH <sub>2</sub> CH <sub>2</sub> O), G(*CH <sub>2</sub> CH <sub>2</sub> OH), G(*CH <sub>2</sub> CH <sub>2</sub> OH) and G(*O) on various of DACs and magnetic moments ..... | S25 |
| Table S9. Values of adsorbed species on Co-Co and magnetic moments .....                                                                                                                                                                                                                                             | S26 |

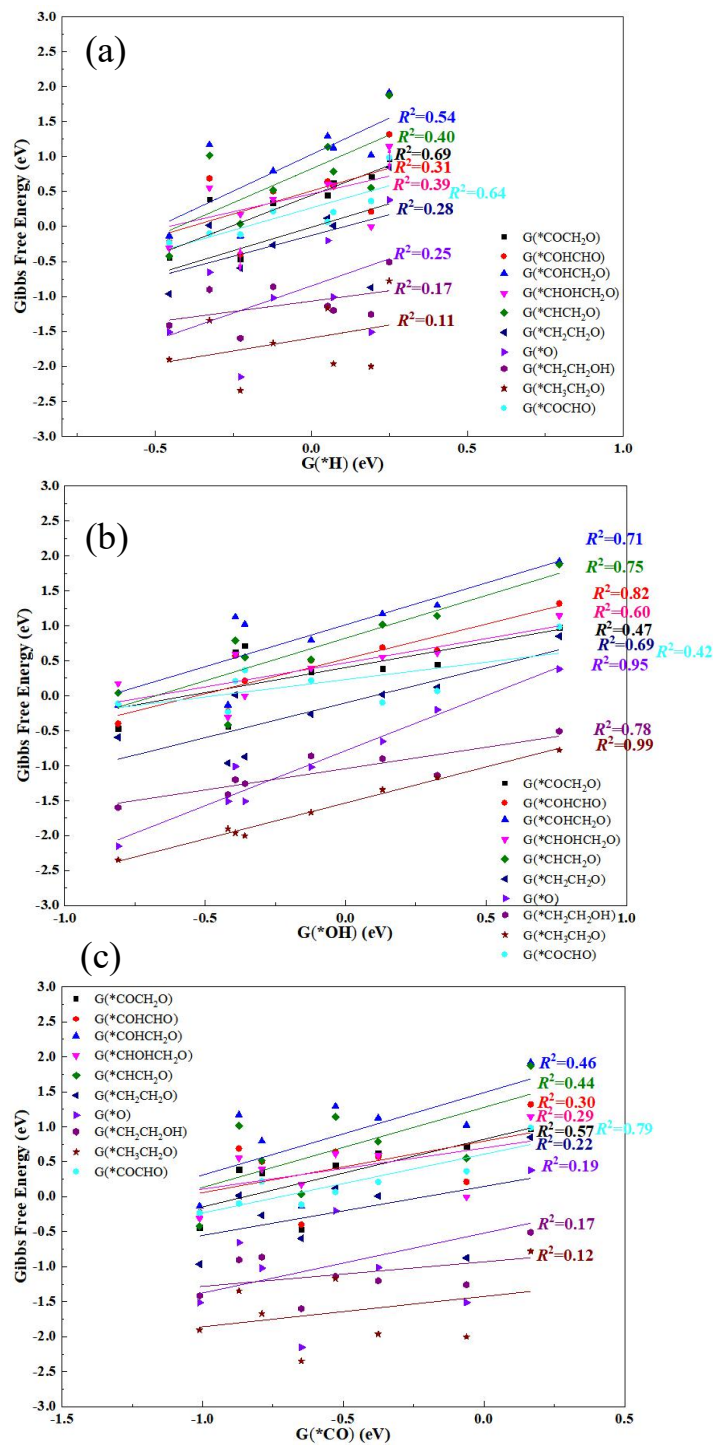

**Figure S1** The adsorption free energy of \*H, \*OH and \*CO against various C<sub>2</sub> related intermediates; (a)  $G(*H)$  versus every C<sub>2</sub> related intermediate; (b)  $G(*OH)$  versus every C<sub>2</sub> related intermediate. The linearity is marked with different color for different intermediates; (c)  $G(*CO)$  versus every C<sub>2</sub> related intermediate. The linearity is marked with different color for different intermediates

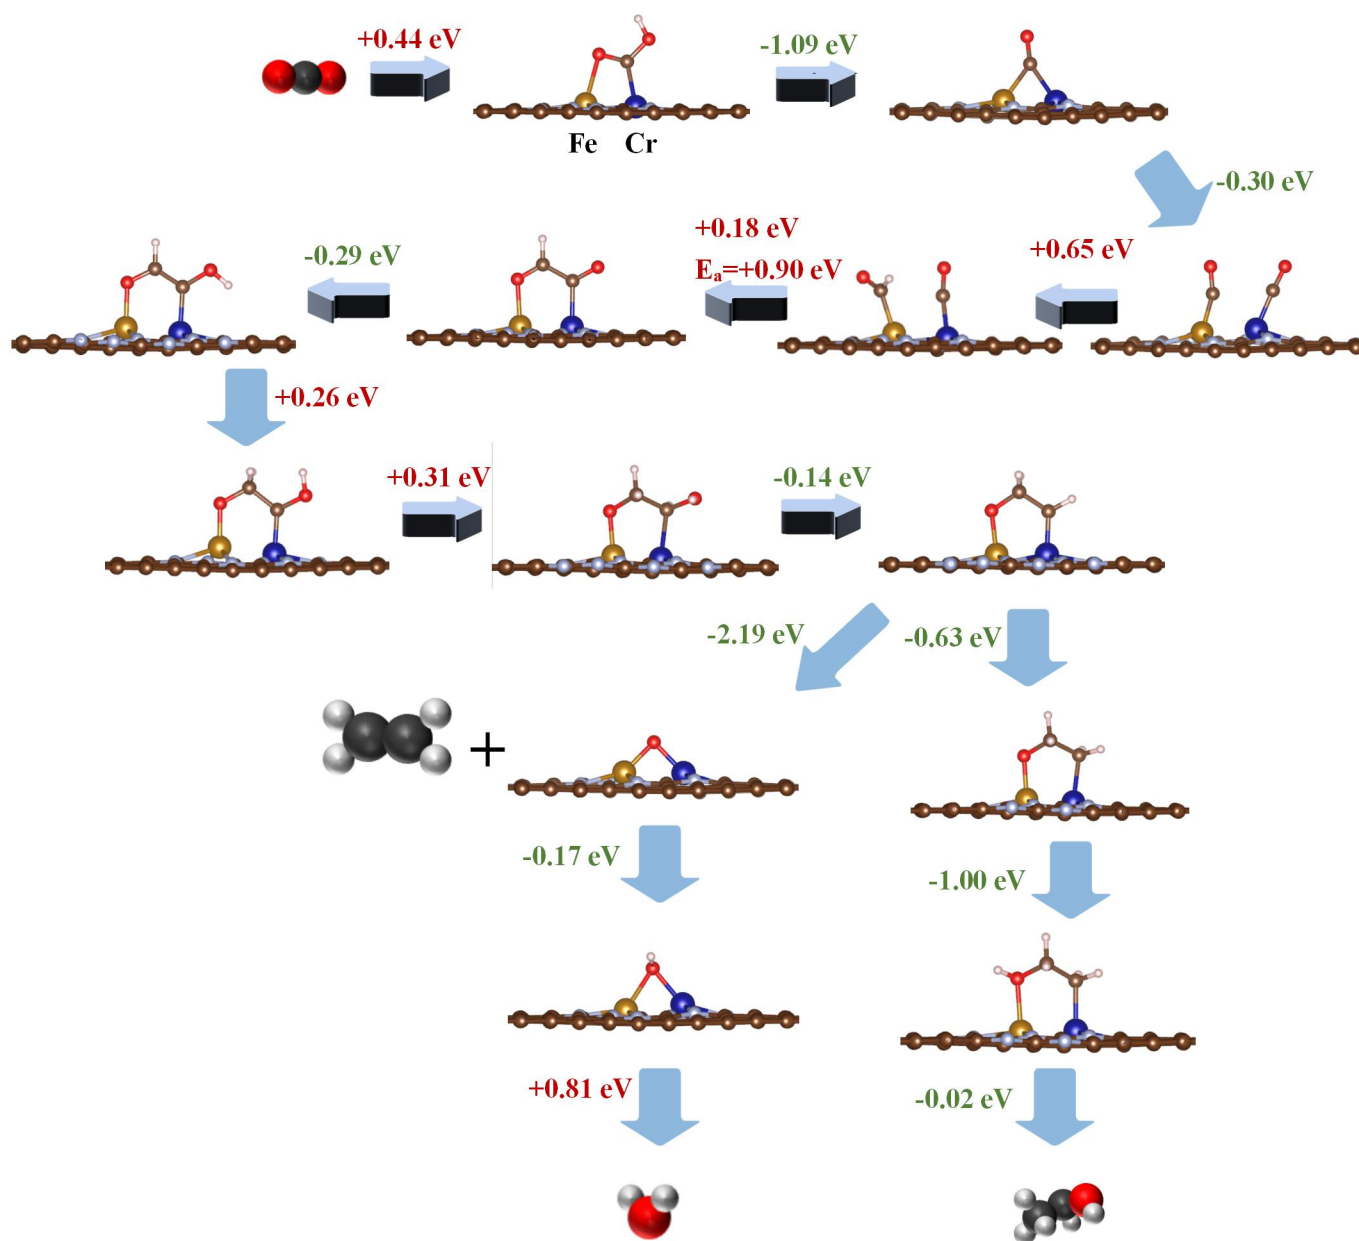

**Figure S2** The pathway for CRR to C<sub>2</sub> products on Cr-Fe based DAC with the minimum limiting potential. The calculated free energies are all at  $U = 0 \text{ V}$  versus RHE. (The red atoms are O, the brown atoms are C, the white atoms are H and the silver atoms in DAC are N)

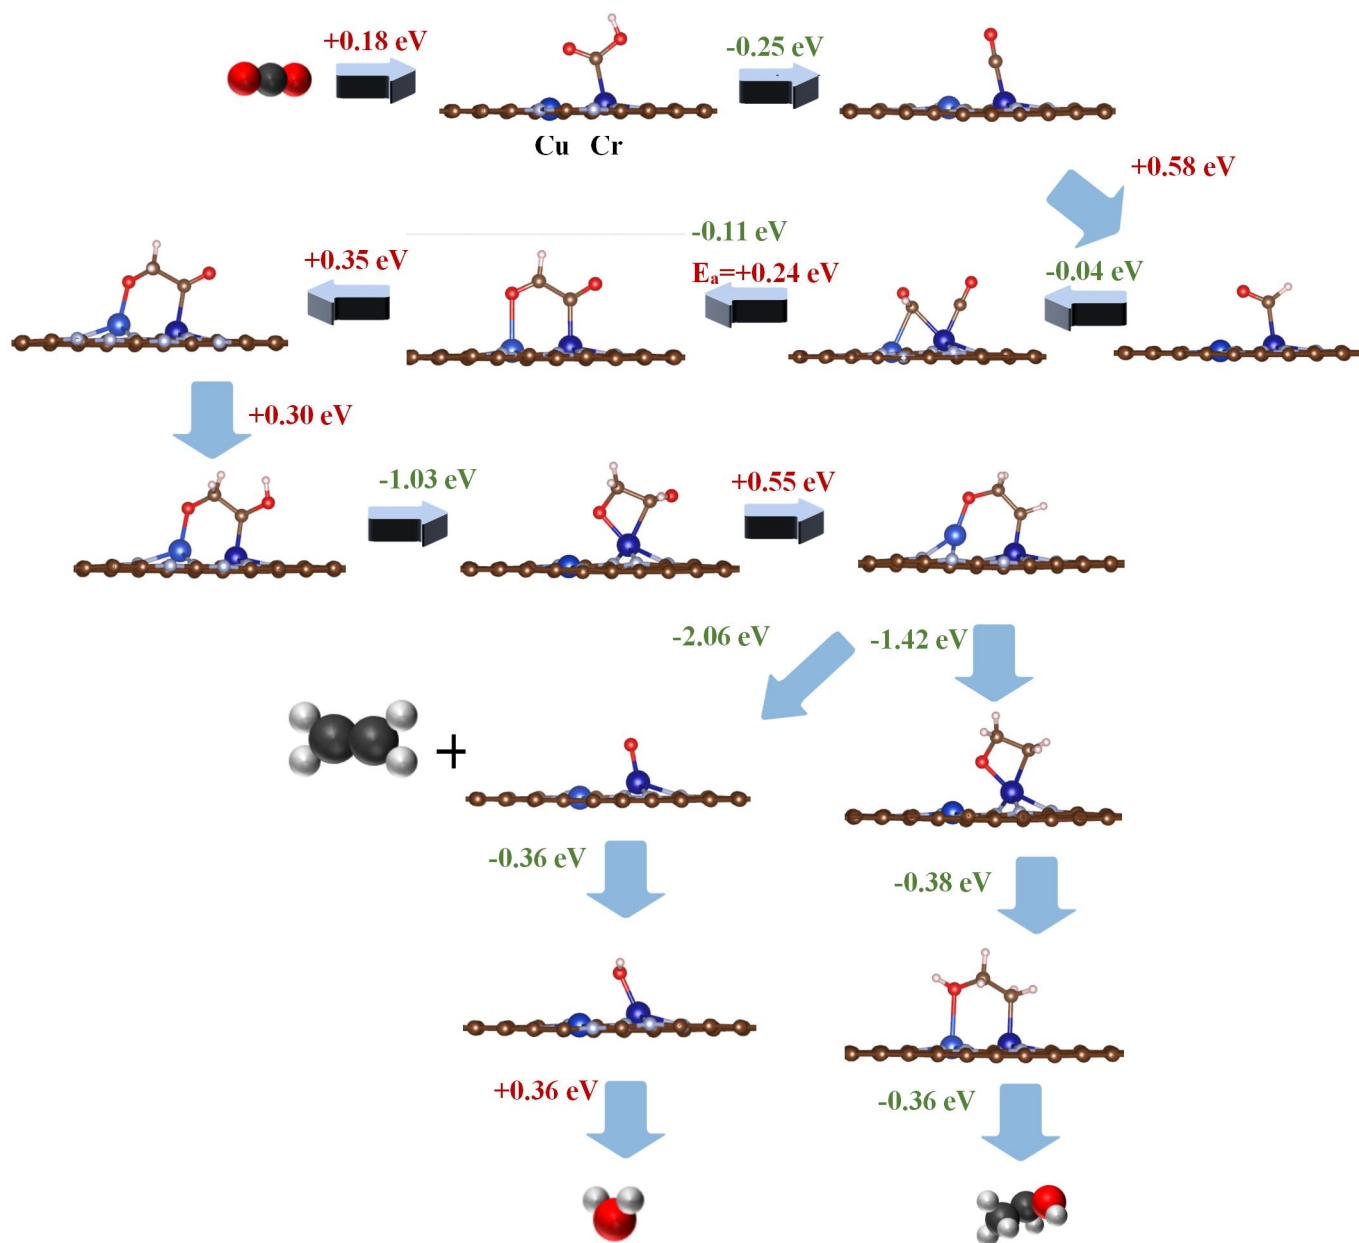

**Figure S3** The pathway for CRR to C<sub>2</sub> products on Cr-Cu based DAC with the minimum limiting potential. The calculated free energies are all at U= 0 V versus RHE. (The red atoms are O, the brown atoms are C, the white atoms are H and the silver atoms in DAC are N)

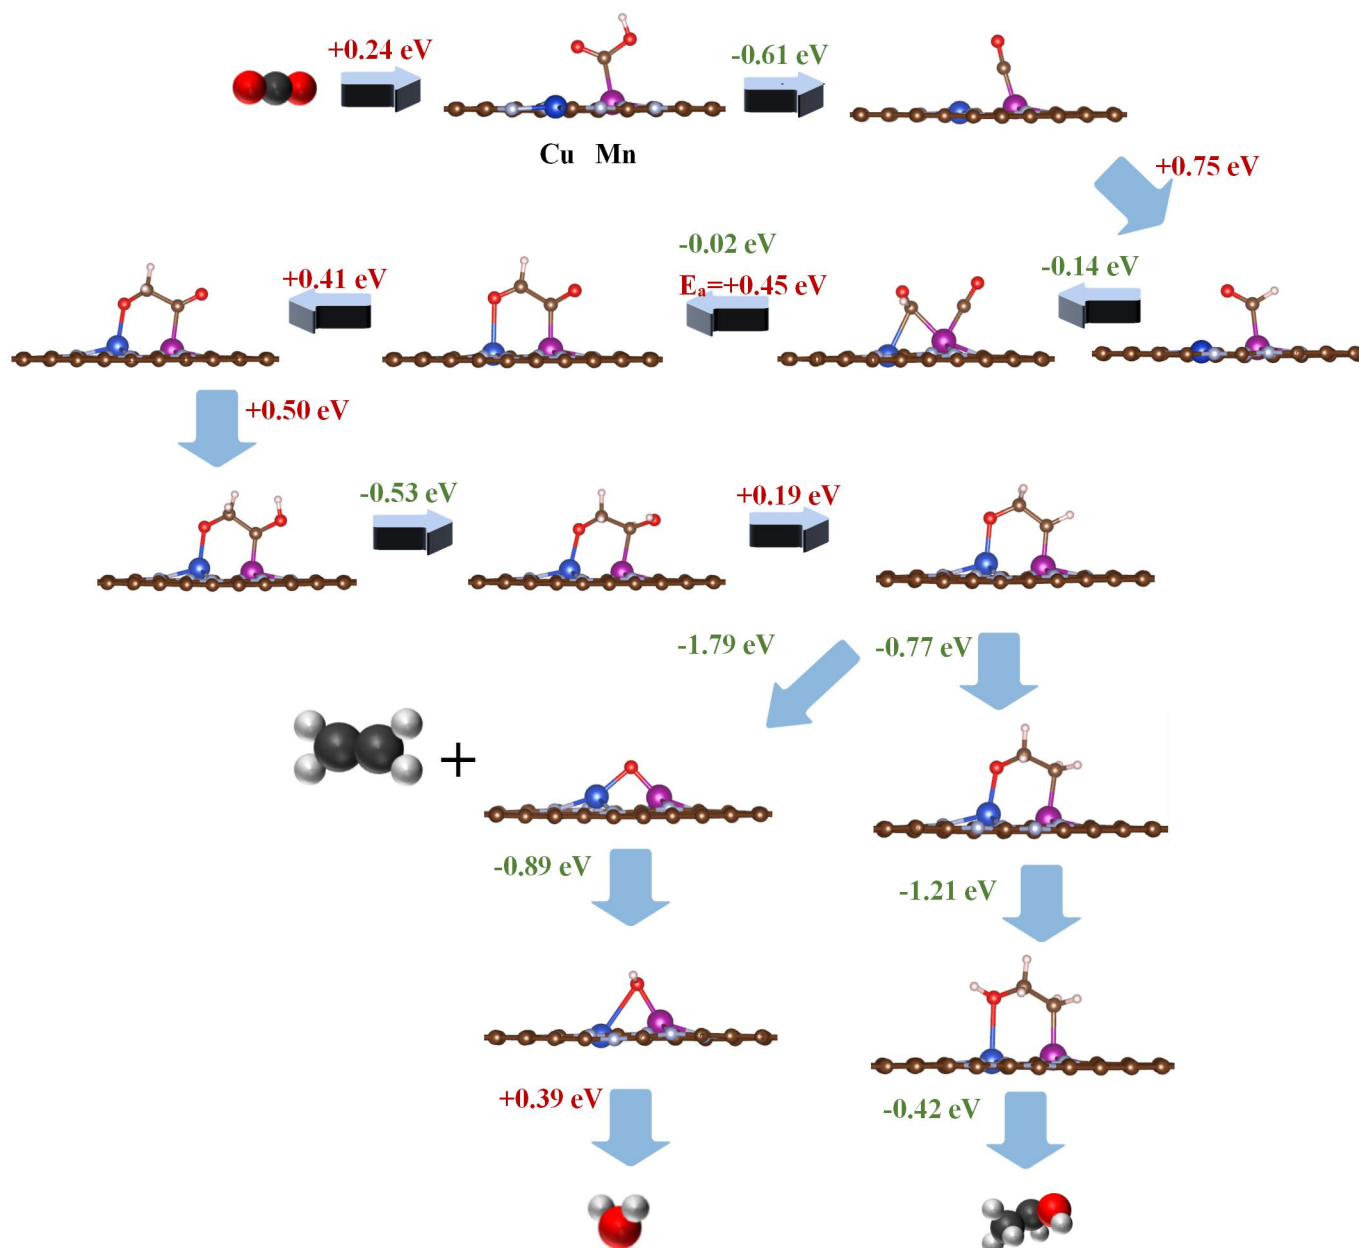

**Figure S4** The pathway for CRR to C<sub>2</sub> products on Mn-Cu based DAC with the minimum limiting potential. The calculated free energies are all at  $U = 0 \text{ V}$  versus RHE. (The red atoms are O, the brown atoms are C, the white atoms are H and the silver atoms in DAC are N)

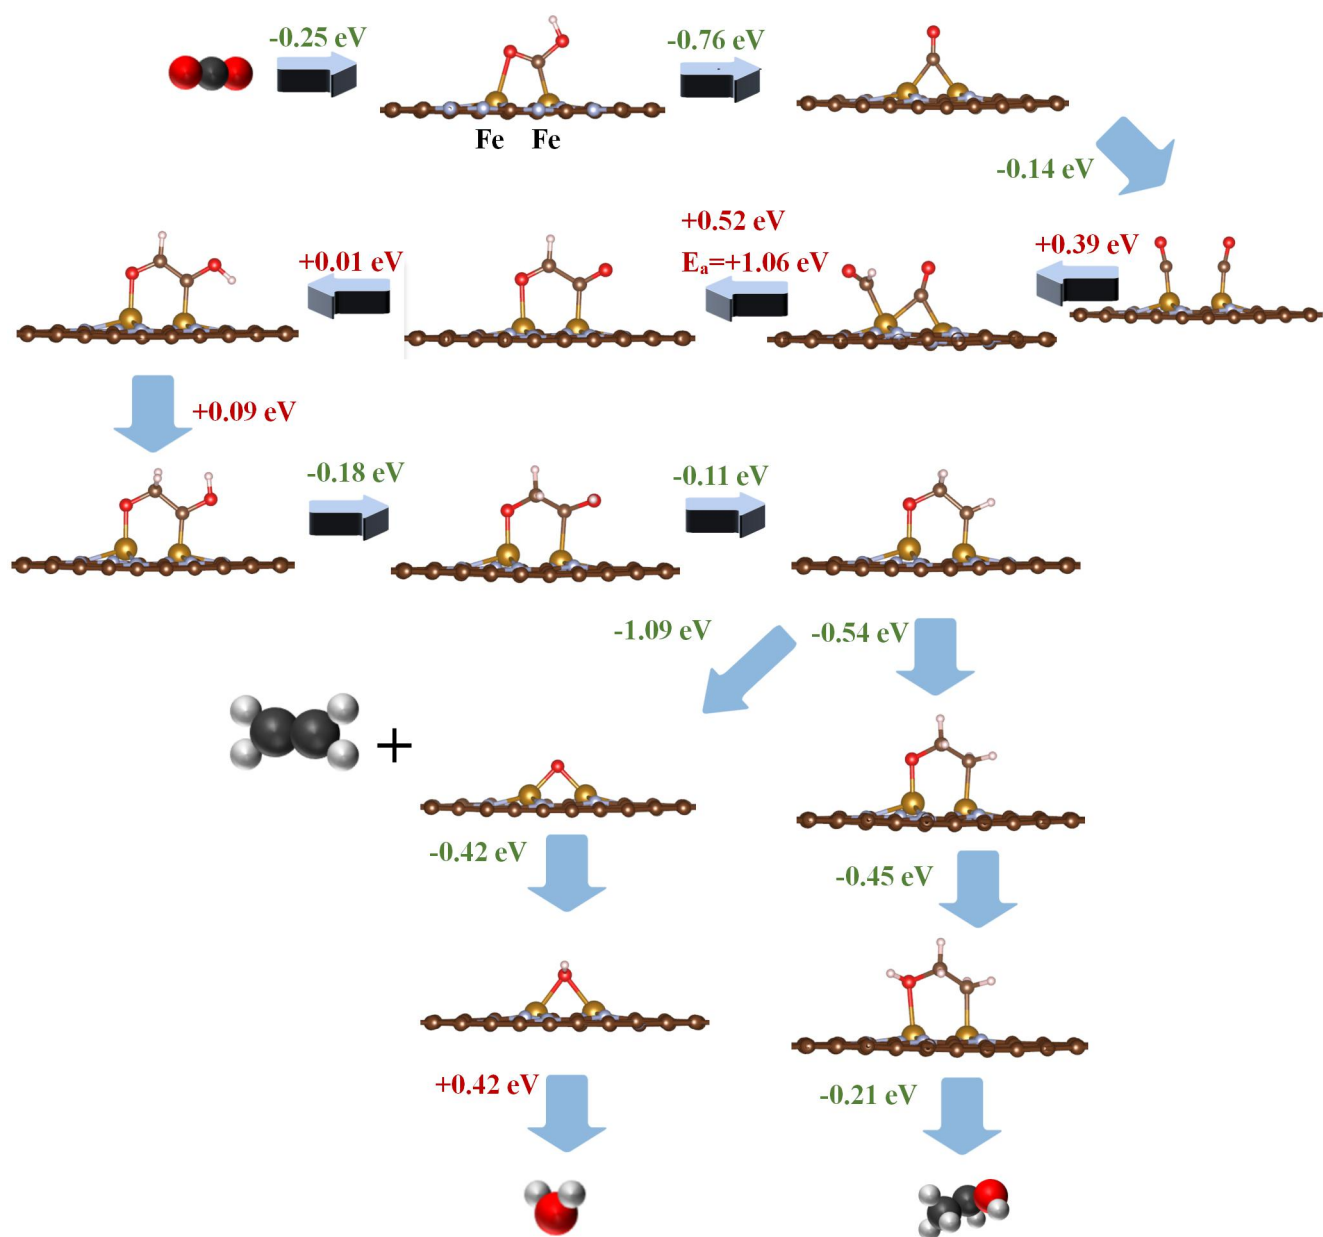

**Figure S5** The pathway for CRR to C<sub>2</sub> products on Fe-Fe based DAC with the minimum limiting potential. The calculated free energies are all at U = 0 V versus RHE. (The red atoms are O, the brown atoms are C, the white atoms are H and the silver atoms in DAC are N)



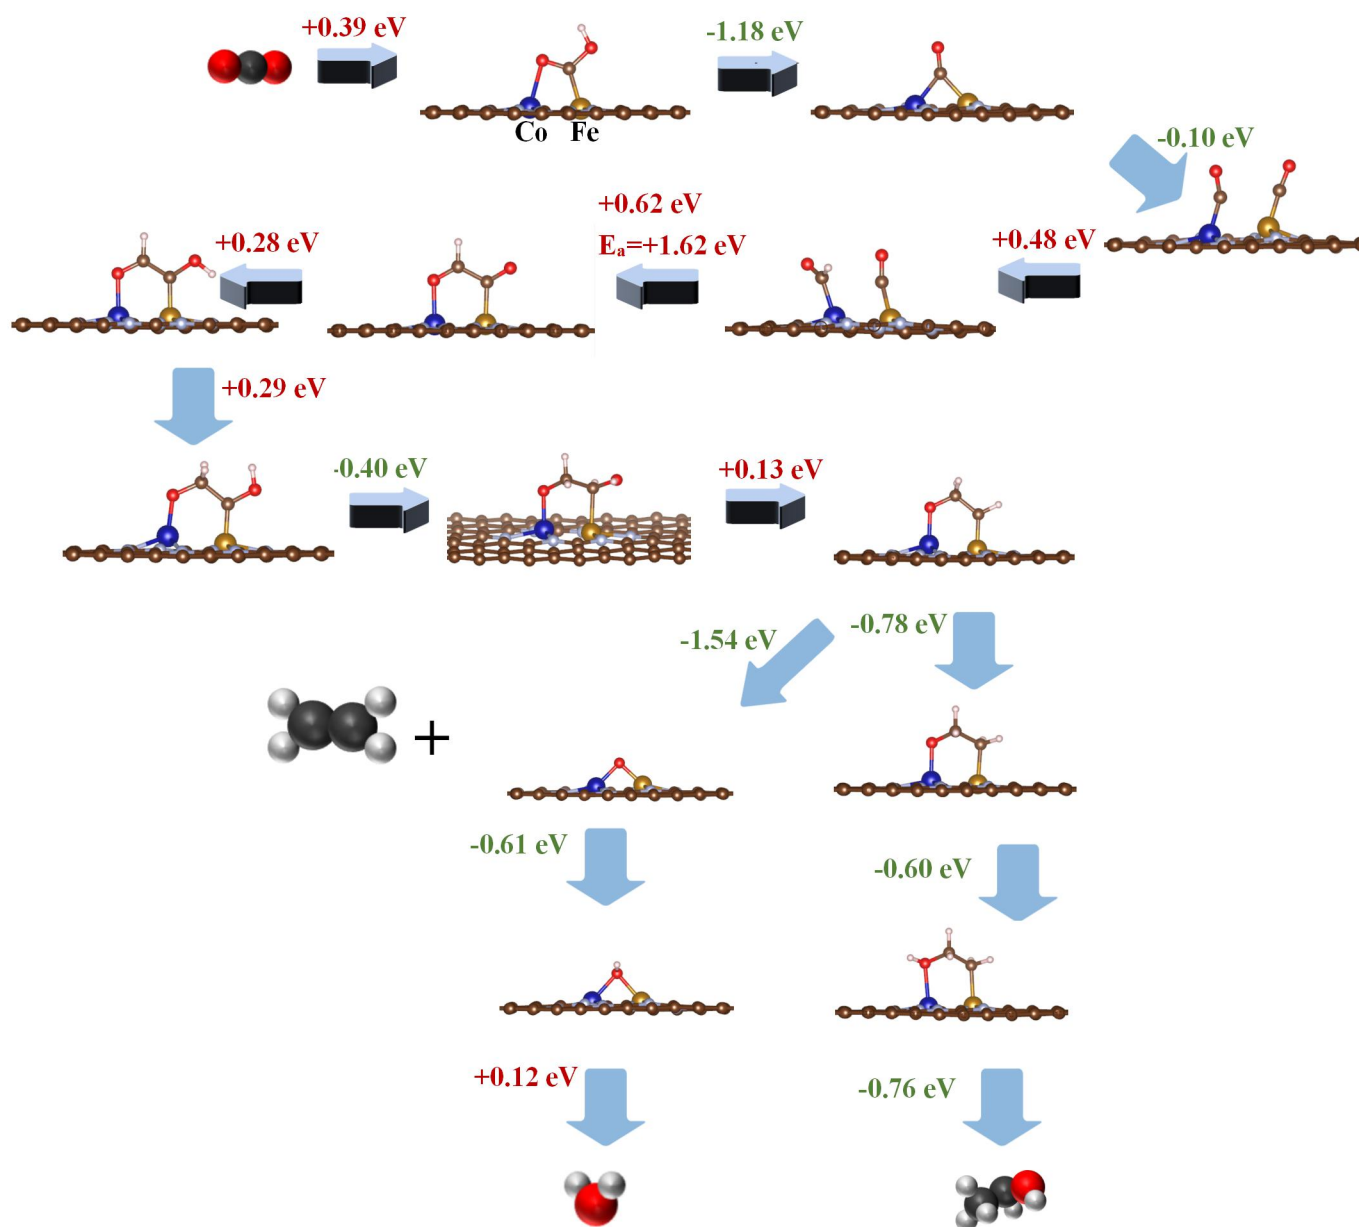

**Figure S6** The pathway for CRR to C<sub>2</sub> products on Fe-Co based DAC with the minimum limiting potential. The calculated free energies are all at U= 0 V versus RHE. (The red atoms are O, the brown atoms are C, the white atoms are H and the silver atoms in DAC are N)

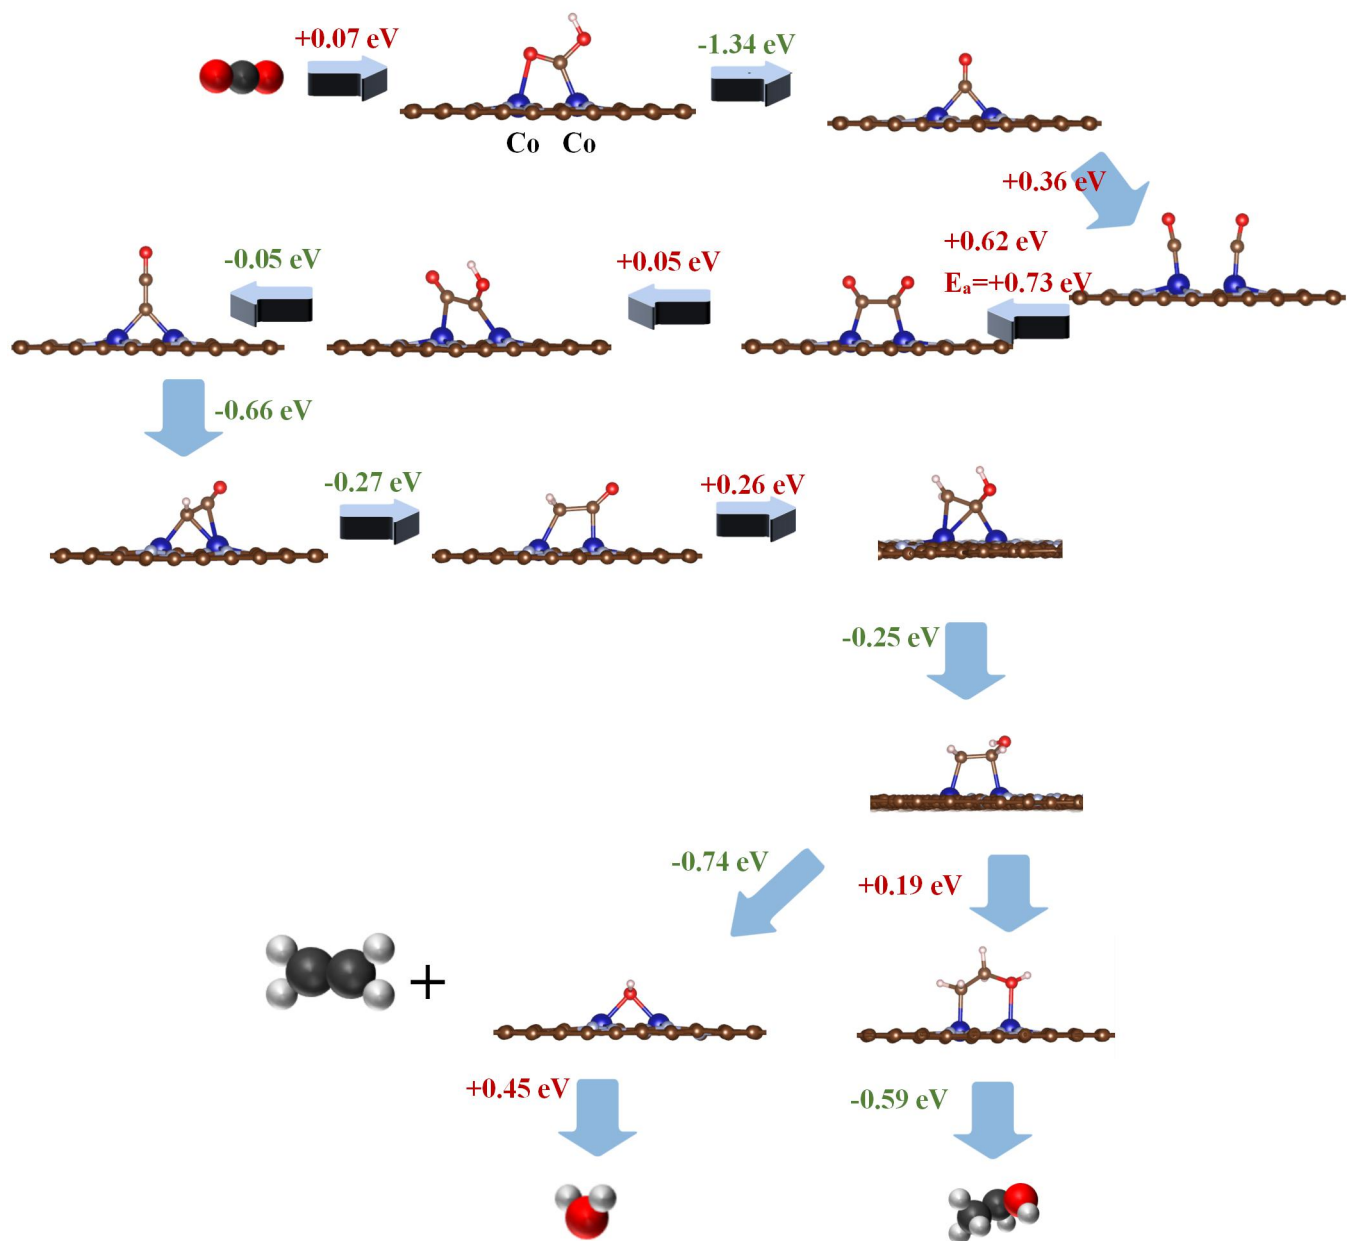

**Figure S7** The pathway for CRR to C<sub>2</sub> products on Co-Co based DAC with the minimum limiting potential. The calculated free energies are all at U= 0 V versus RHE. (The red atoms are O, the brown atoms are C, the white atoms are H and the silver atoms in DAC are N)

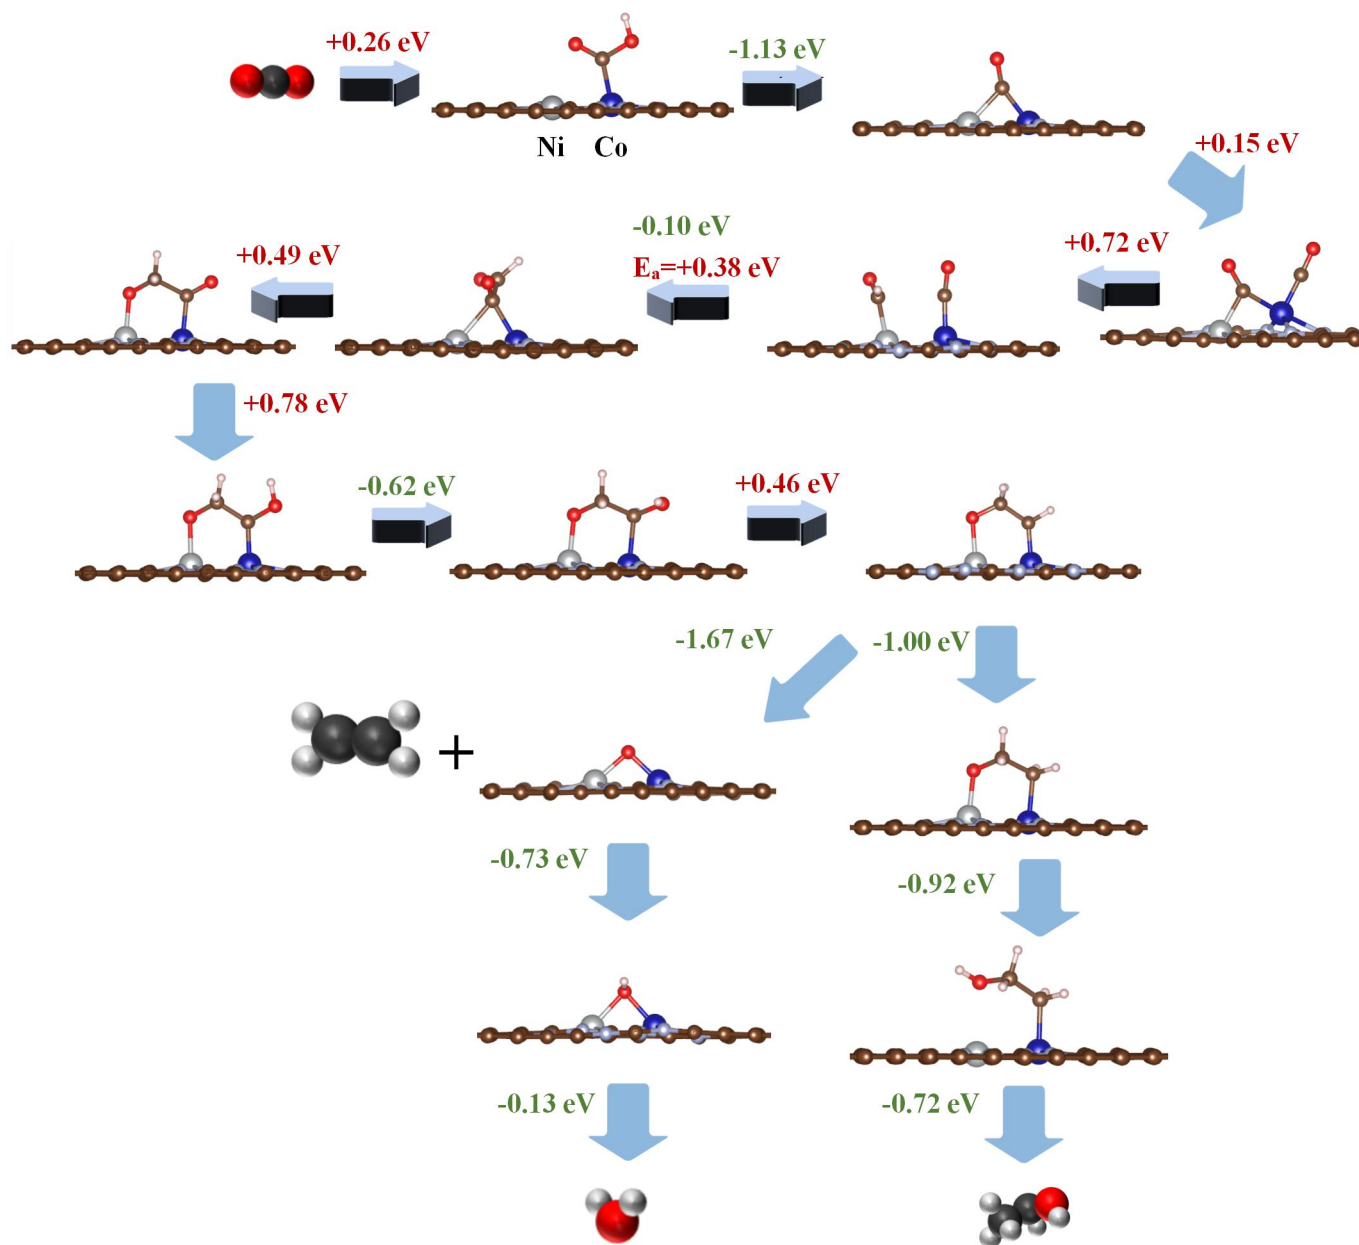

**Figure S8** The pathway for CRR to C<sub>2</sub> products on Co-Ni based DAC with the minimum limiting potential. The calculated free energies are all at U = 0 V versus RHE. (The red atoms are O, the brown atoms are C, the white atoms are H and the silver atoms in DAC are N)

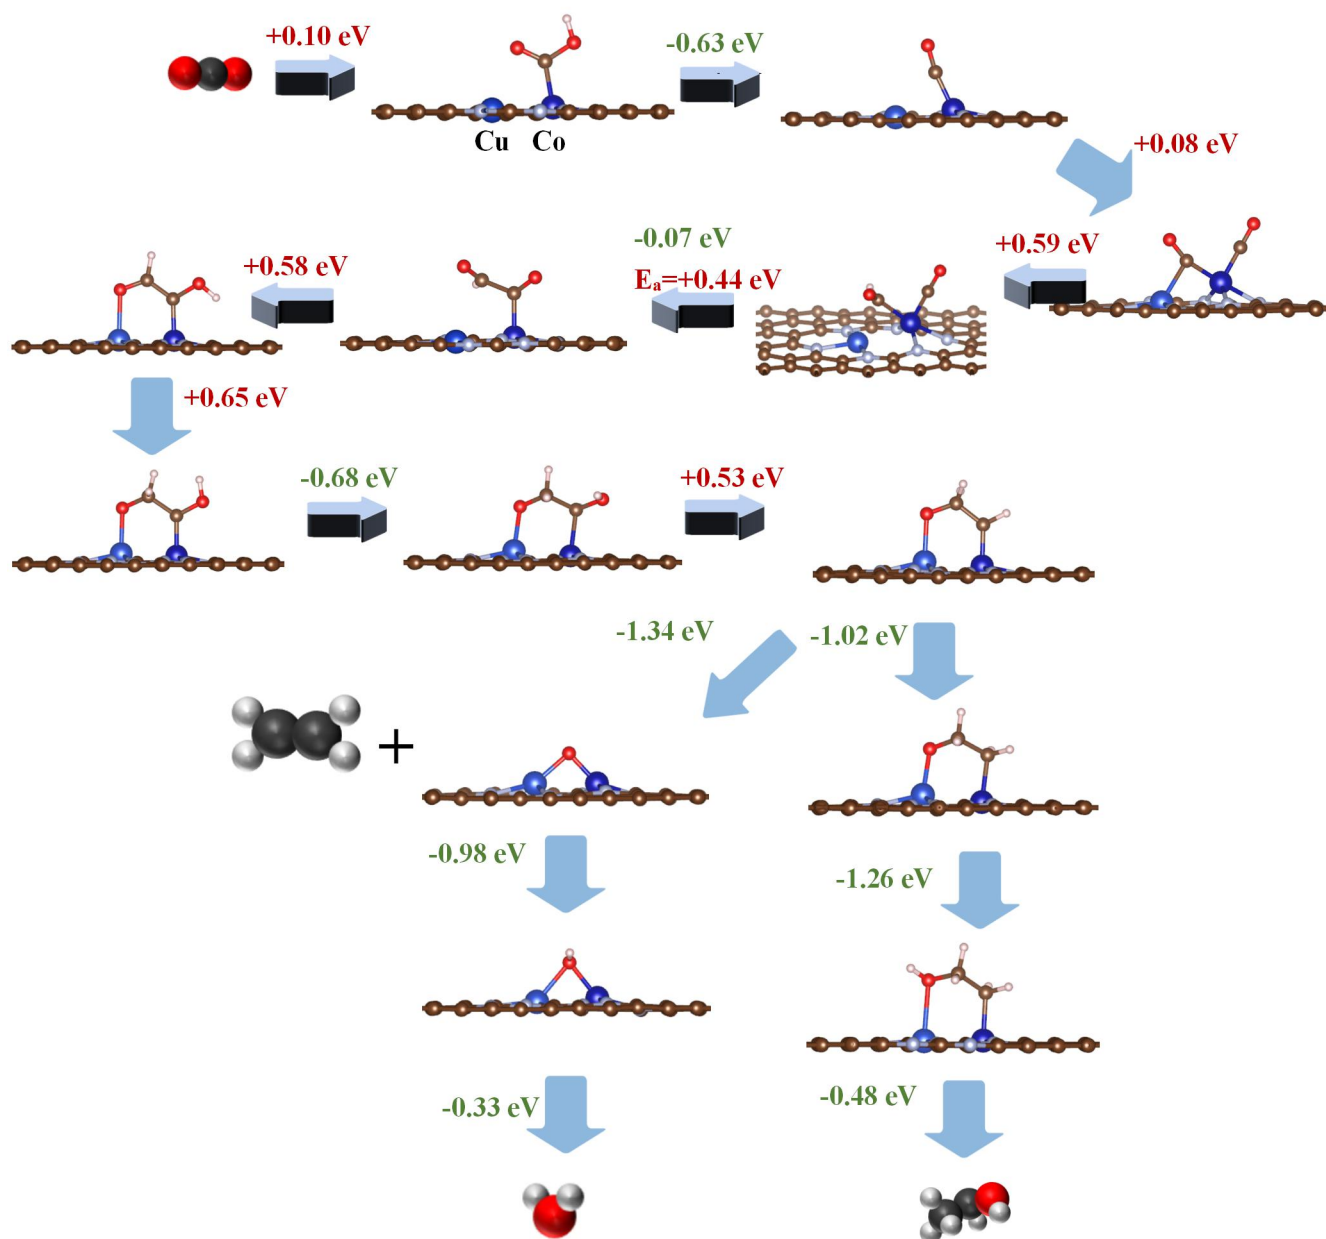

**Figure S9** The pathway for CRR to  $\text{C}_2$  products on Co-Cu based DAC with the minimum limiting potential. The calculated free energies are all at  $U = 0$  V versus RHE. (The red atoms are O, the brown atoms are C, the white atoms are H and the silver atoms in DAC are N)

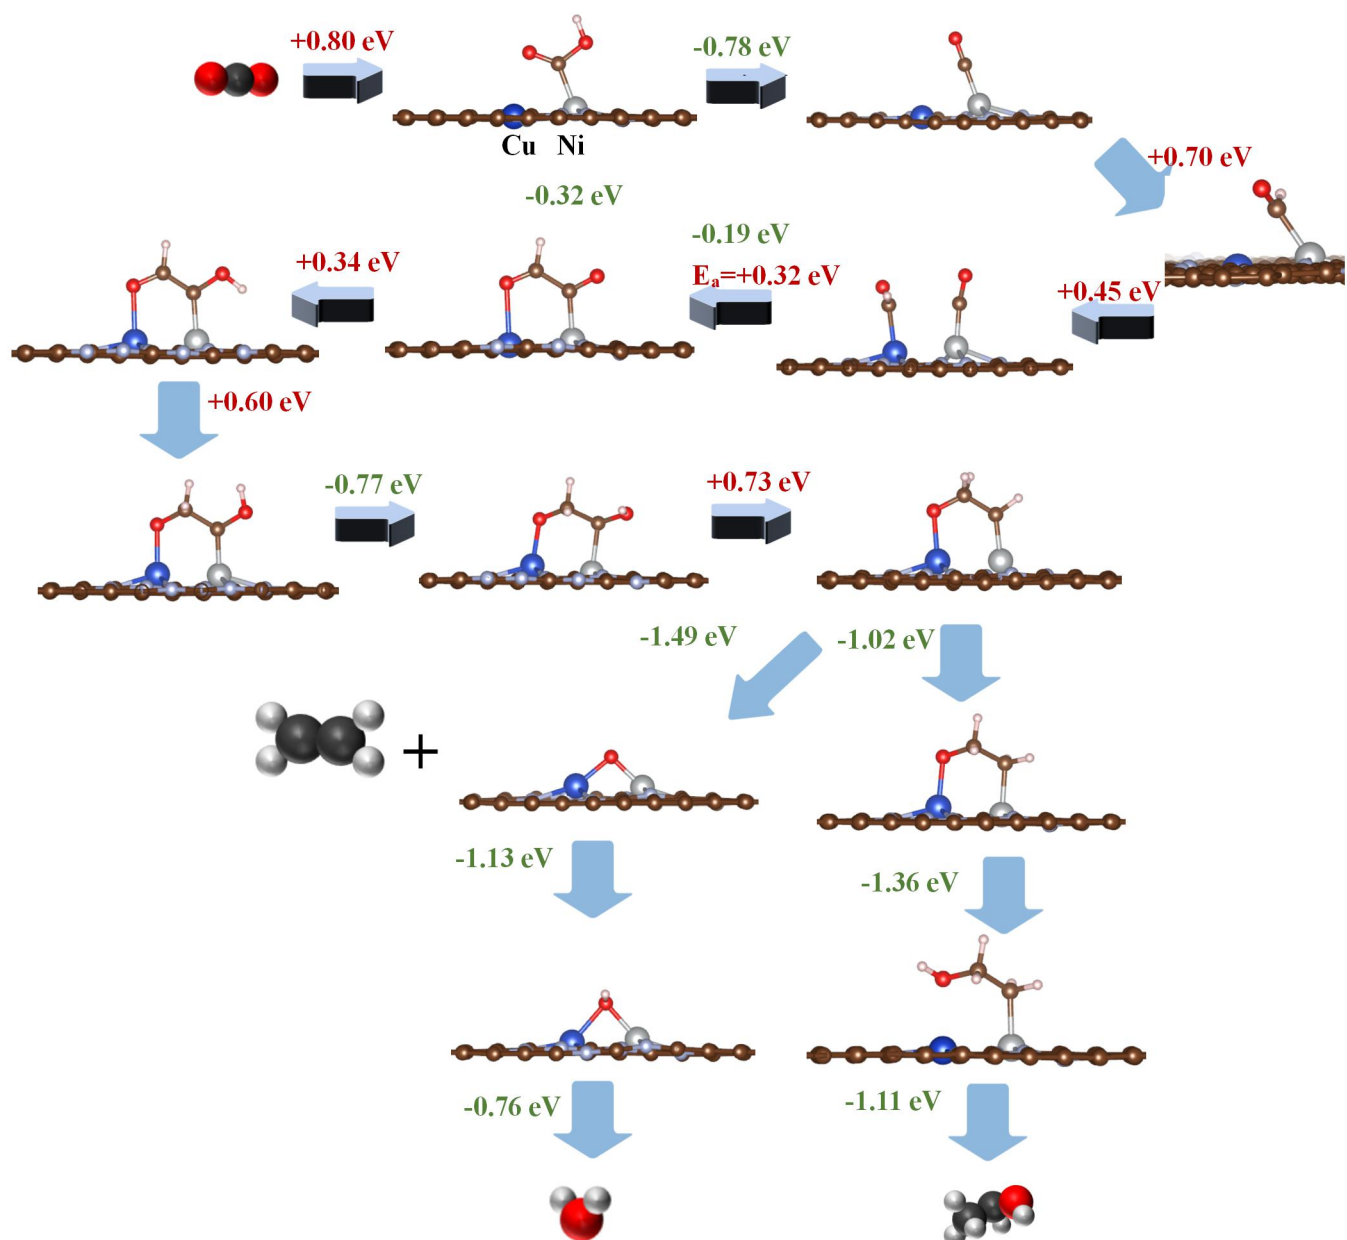

**Figure S10** The pathway for CRR to C<sub>2</sub> products on Ni-Cu based DAC with the minimum limiting potential. The calculated free energies are all at U= 0 V versus RHE. (The red atoms are O, the brown atoms are C, the white atoms are H and the silver atoms in DAC are N)

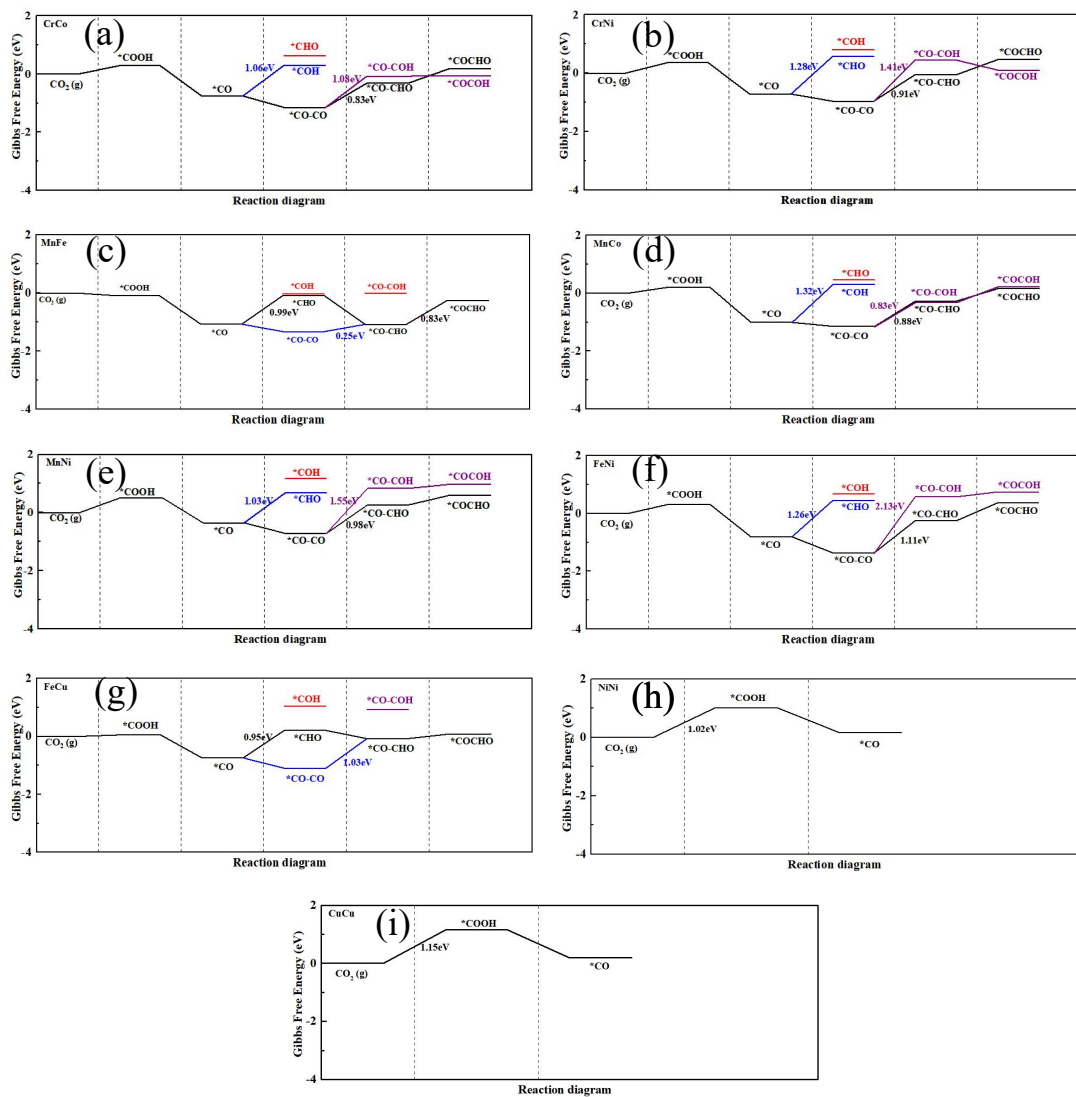

**Figure S11** The reaction diagrams of CRR on other DACs. The value larger than +0.8 eV means that the corresponding reaction is difficult to happen.

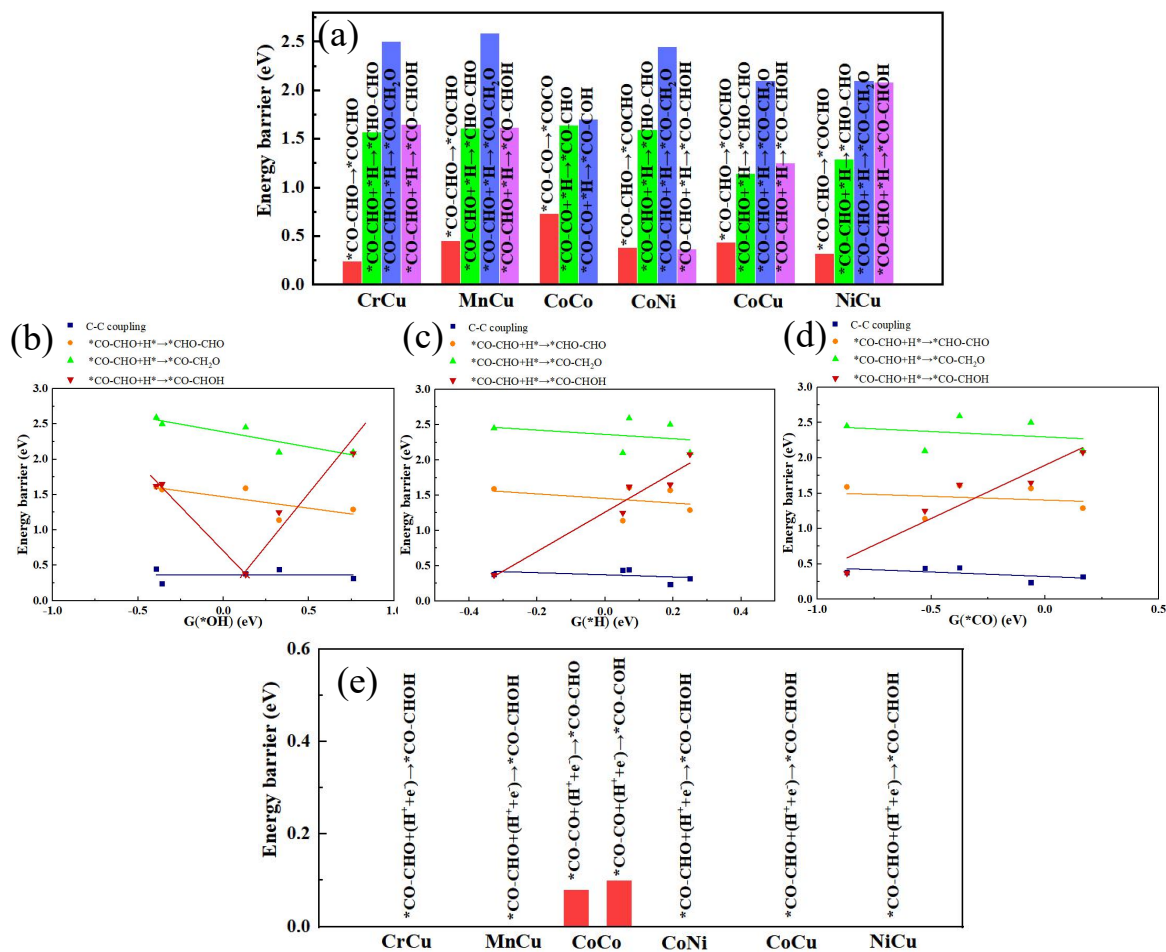

**Figure S12** Comparison of energy barriers between the coupling process and protonation process on DACs, and the relationship with the descriptors: (a) comparison between the energy barriers of different reactions (LH mechanism); (b) relationship between the energy barriers and  $G(*OH)$ ; (c) relationship between the energy barriers and  $G(*H)$ ; (d) relationship between the energy barriers and  $G(*CO)$ ; (e) energy barriers of protonation process via ER mechanism at applied potential.



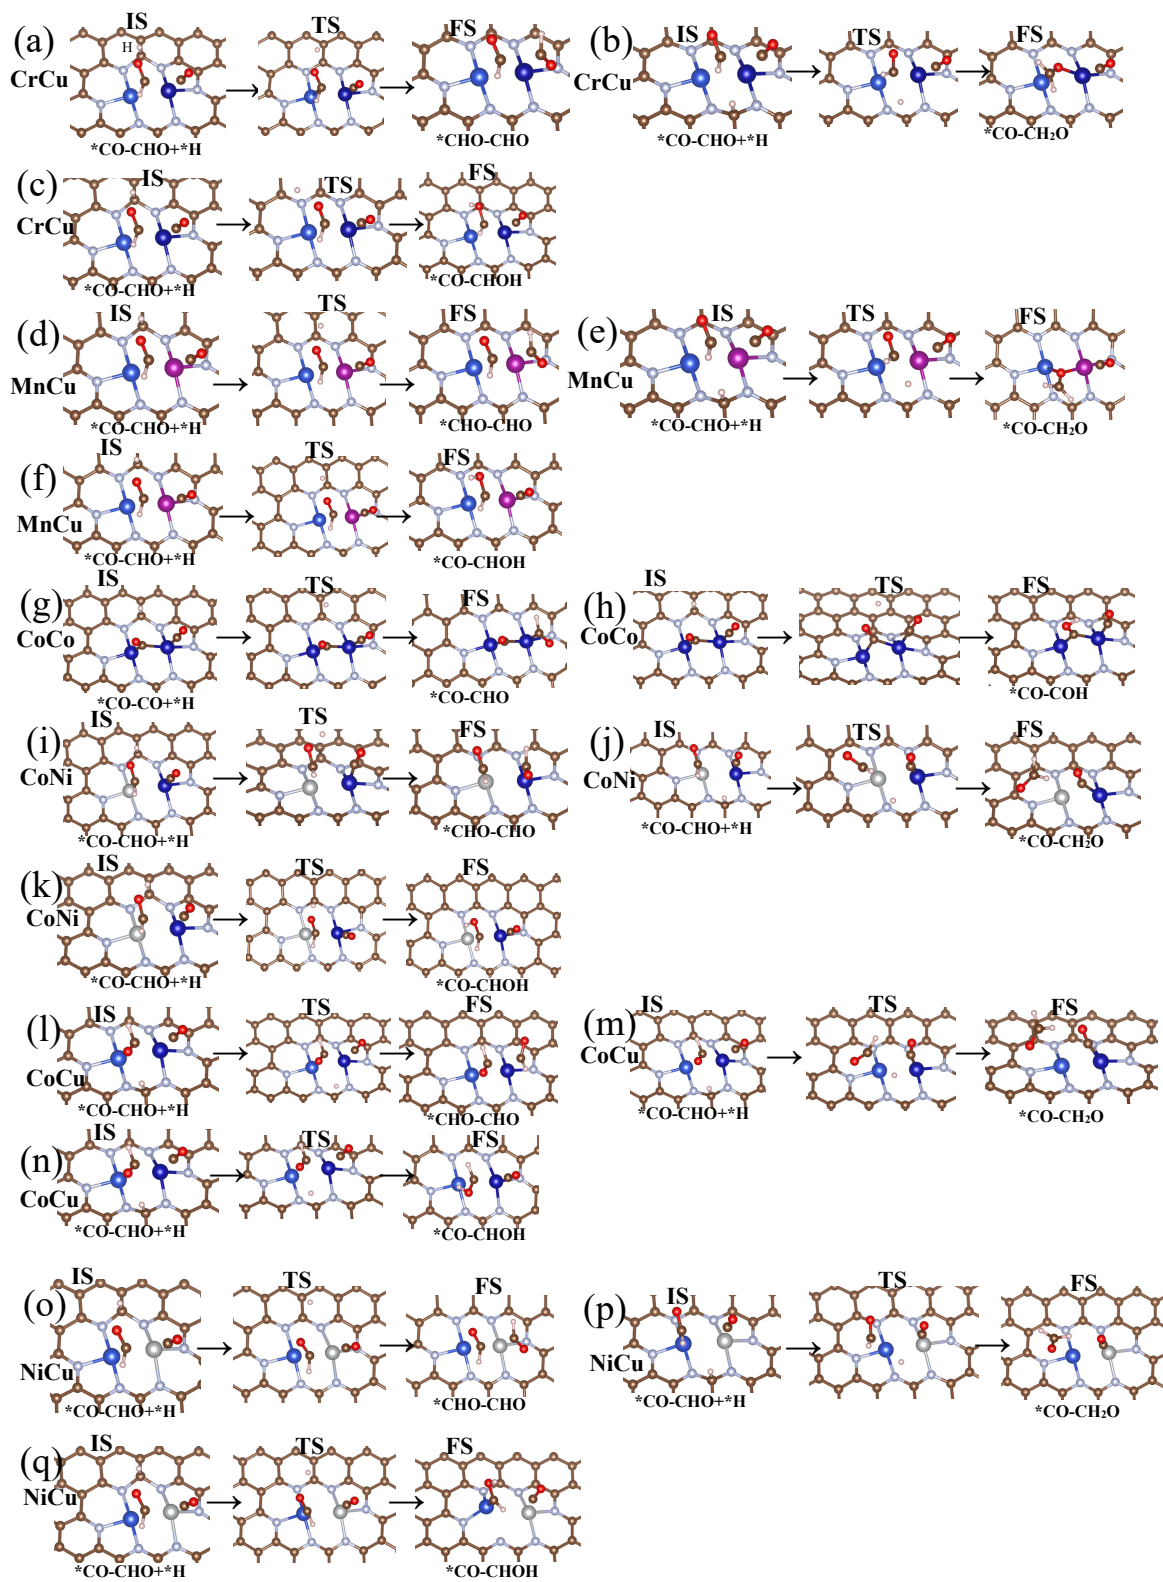

**Figure S13** Configurations of protonation process of  $*CO-CHO$  or  $*CO-CO$  on DACs (LH mechanism).



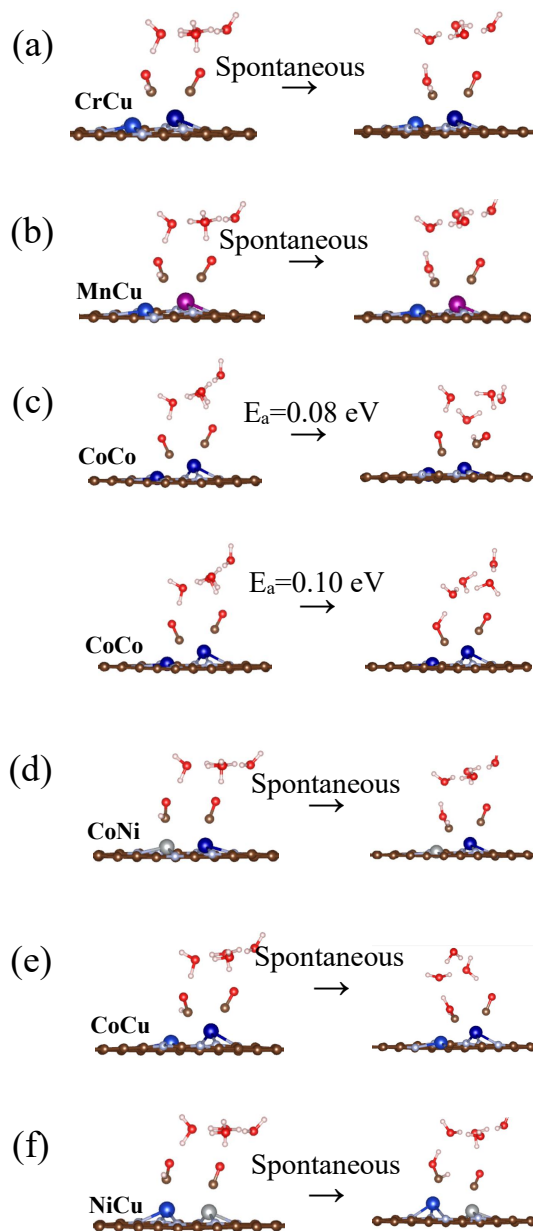

**Figure S14** Protonation process of \*CO-CHO or \*CO-CO on DACs (ER mechanism) at applied potential: (a) \*CO-CHO + (H<sup>+</sup> + e<sup>-</sup>) → \*CO-CHOH on Cr-Cu; (b) \*CO-CHO + (H<sup>+</sup> + e<sup>-</sup>) → \*CO-CHOH on Mn-Cu; (c) \*CO-CO + (H<sup>+</sup> + e<sup>-</sup>) → \*CO-CHO on Co-Co; \*CO-CO + (H<sup>+</sup> + e<sup>-</sup>) → \*CO-COH on Co-Co; (d) \*CO-CHO + (H<sup>+</sup> + e<sup>-</sup>) → \*CO-CHOH on Co-Ni; (e) \*CO-CHO + (H<sup>+</sup> + e<sup>-</sup>) → \*CO-CHOH on Co-Cu; (f) \*CO-CHO + (H<sup>+</sup> + e<sup>-</sup>) → \*CO-CHOH on Ni-Cu;

**Table S1.** Average binding energies (eV) of metal atoms for TM<sub>2</sub>N<sub>6</sub>-graphene system and average cohesive energy in bulk metals for doped two metal atoms

| TM atoms | Average binding energy (eV) | Average cohesive energy (bulk metal) (eV) | Difference value between binding energy and cohesive energy (bulk metal) (eV) | Magnetic moment ( $\mu_B$ ) |
|----------|-----------------------------|-------------------------------------------|-------------------------------------------------------------------------------|-----------------------------|
| CrCr     | -4.66                       | -4.10                                     | -0.56                                                                         | 7.99                        |
| CrMn     | -4.59                       | -3.51                                     | -1.08                                                                         | 8.15                        |
| CrFe     | -5.14                       | -4.19                                     | -0.95                                                                         | 6.23                        |
| CrCo     | -5.67                       | -4.25                                     | -1.42                                                                         | 1.50                        |
| CrNi     | -5.45                       | -4.27                                     | -1.18                                                                         | 2.70                        |
| CrCu     | -4.72                       | -3.80                                     | -0.92                                                                         | 3.53                        |
| MnMn     | -4.58                       | -2.92                                     | -1.66                                                                         | 7.06                        |
| MnFe     | -5.25                       | -3.60                                     | -1.65                                                                         | 5.57                        |
| MnCo     | -5.62                       | -3.66                                     | -1.96                                                                         | 2.51                        |
| MnNi     | -5.58                       | -3.68                                     | -1.90                                                                         | 3.40                        |
| MnCu     | -4.58                       | -3.21                                     | -1.37                                                                         | 3.51                        |
| FeFe     | -5.93                       | -4.28                                     | -1.65                                                                         | 4.16                        |
| FeCo     | -6.26                       | -4.34                                     | -1.92                                                                         | 3.20                        |
| FeNi     | -5.96                       | -4.36                                     | -1.6                                                                          | 2.92                        |
| FeCu     | -5.06                       | -3.89                                     | -1.17                                                                         | 2.16                        |
| CoCo     | -6.32                       | -4.39                                     | -1.93                                                                         | 2.42                        |
| CoNi     | -6.15                       | -4.42                                     | -1.73                                                                         | 1.03                        |
| CoCu     | -5.31                       | -3.94                                     | -1.37                                                                         | 0.66                        |
| NiNi     | -6.06                       | -4.44                                     | -1.62                                                                         | 0.00                        |
| NiCu     | -5.11                       | -3.97                                     | -1.14                                                                         | 0.21                        |
| CuCu     | -4.22                       | -3.49                                     | -0.73                                                                         | 0.80                        |

**Table S2.** The values of thermal correction containing the zero-point energy, the enthalpic correction, and the entropy correction of the relevant molecules, and the adsorbed species. The temperature is set as 298 K.

| Species                              | Zero-point energy (eV) | Enthalpic correction at 298K (eV) | Entropy at 298K (eV) | Correction for liquid phase (eV) | Solvent correction (eV) |
|--------------------------------------|------------------------|-----------------------------------|----------------------|----------------------------------|-------------------------|
| CO <sub>2</sub> (g)                  | 0.31                   | 0.13                              | 0.66                 | /                                | /                       |
| H <sub>2</sub> O (l)                 | 0.57                   | 0.1                               | 0.58                 | -0.09                            | /                       |
| H <sub>2</sub> (g)                   | 0.27                   | 0.09                              | 0.40                 | /                                | /                       |
| C <sub>2</sub> H <sub>5</sub> OH (l) | 2.11                   | 0.20                              | 0.83                 | -0.07                            | /                       |
| C <sub>2</sub> H <sub>4</sub> (g)    | 1.36                   | 0.13                              | 0.71                 | /                                | /                       |
| *H                                   | 0.17                   | 0.03                              | 0.02                 | /                                | /                       |
| *OH                                  | 0.37                   | 0.05                              | 0.08                 | /                                | -0.20                   |
| *COOH                                | 0.6                    | 0.08                              | 0.22                 | /                                | -0.10                   |
| *CO                                  | 0.19                   | 0.05                              | 0.18                 | /                                | /                       |
| *CHO                                 | 0.51                   | 0.08                              | 0.08                 | /                                | /                       |
| *COH                                 | 0.57                   | 0.06                              | 0.09                 | /                                | -0.10                   |
| *CO-CO                               | 0.41                   | 0.13                              | 0.29                 | /                                | /                       |
| *COCO                                | 0.42                   | 0.11                              | 0.24                 | /                                | /                       |
| *CO-CHO                              | 0.70                   | 0.11                              | 0.30                 | /                                | /                       |
| *COCHO                               | 0.72                   | 0.10                              | 0.29                 | /                                | /                       |
| *CO-COH                              | 0.74                   | 0.13                              | 0.24                 | /                                | -0.10                   |
| *COCOH                               | 0.72                   | 0.11                              | 0.28                 | /                                | -0.10                   |
| *COCH <sub>2</sub> O                 | 1.05                   | 0.12                              | 0.23                 | /                                | /                       |
| *COHCHO                              | 1.03                   | 0.13                              | 0.26                 | /                                | -0.10                   |
| *COHCH <sub>2</sub> O                | 1.33                   | 0.13                              | 0.26                 | /                                | -0.10                   |
| *CHOHCH <sub>2</sub> O               | 1.66                   | 0.15                              | 0.26                 | /                                | -0.10                   |
| *CHCH <sub>2</sub> O                 | 1.15                   | 0.11                              | 0.22                 | /                                | /                       |
| *CH <sub>2</sub> CH <sub>2</sub> O   | 1.55                   | 0.12                              | 0.18                 | /                                | /                       |
| *CH <sub>2</sub> CH <sub>2</sub> OH  | 1.86                   | 0.12                              | 0.26                 | /                                | -0.10                   |
| *CH <sub>3</sub> CH <sub>2</sub> O   | 1.89                   | 0.12                              | 0.24                 | /                                | /                       |
| *COHCOH                              | 1.00                   | 0.13                              | 0.31                 | /                                | -0.10                   |
| *CCO                                 | 0.34                   | 0.08                              | 0.18                 | /                                | /                       |
| *CHCO                                | 0.63                   | 0.09                              | 0.19                 | /                                | /                       |
| *CCOH                                | 0.63                   | 0.10                              | 0.21                 | /                                | -0.10                   |
| *CH <sub>2</sub> CO                  | 0.92                   | 0.10                              | 0.13                 | /                                | /                       |
| *CHCOH                               | 0.89                   | 0.12                              | 0.20                 | /                                | -0.10                   |
| *CH <sub>2</sub> COH                 | 1.24                   | 0.13                              | 0.17                 | /                                | -0.10                   |
| *CH <sub>2</sub> CHOH                | 1.55                   | 0.13                              | 0.22                 | /                                | -0.10                   |

**Table S3.** Values of  $G(^*H)$ ,  $G(^*OH)$  on various of DACs and magnetic moments, the DACs of which  $G(^*H)$  or  $G(^*OH)$  lower than -0.9 eV are excluded

| TM atoms | $G(^*H)$ (eV)    | Magnetic moment<br>( $\mu_B$ ) | $G(^*OH)$ (eV)   | Magnetic moment<br>( $\mu_B$ ) |
|----------|------------------|--------------------------------|------------------|--------------------------------|
| CrCr     | -0.83            | 7.10                           | -1.79 (<-0.9 eV) | 6.90                           |
| CrMn     | -1.05 (<-0.9 eV) | 0.34                           | -1.43 (<-0.9 eV) | 6.23                           |
| CrFe     | -0.23            | 1.48                           | -0.81            | 0.29                           |
| CrCo     | -0.34            | 2.84                           | -0.86            | 2.72                           |
| CrNi     | -0.32            | 3.57                           | -0.55            | 1.96                           |
| CrCu     | 0.19             | 2.89                           | -0.36            | 2.96                           |
| MnMn     | -0.71            | 5.88                           | -1.13 (<-0.9 eV) | 6.11                           |
| MnFe     | -0.52            | 4.63                           | -0.80            | 4.48                           |
| MnCo     | -0.50            | 3.41                           | -0.54            | 3.18                           |
| MnNi     | 0.07             | 2.97                           | 0.00             | 2.45                           |
| MnCu     | 0.07             | 3.31                           | -0.39            | 3.50                           |
| FeFe     | -0.46            | 3.24                           | -0.42            | 3.29                           |
| FeCo     | -0.12            | 2.61                           | -0.12            | 1.25                           |
| FeNi     | -0.19            | 1.68                           | -0.10            | 1.13                           |
| FeCu     | 0.09             | 1.56                           | -0.18            | 2.24                           |
| CoCo     | -0.47            | 1.05                           | -0.45            | 0.00                           |
| CoNi     | -0.33            | 0.00                           | 0.13             | 0.59                           |
| CoCu     | 0.05             | 0.00                           | 0.33             | 1.23                           |
| NiNi     | -0.01            | 0.00                           | 0.86             | 0.21                           |
| NiCu     | 0.25             | 0.50                           | 0.76             | 0.69                           |
| CuCu     | 0.59             | 0.00                           | 0.79             | 1.18                           |

**Table S4.** Values of  $G(*\text{COOH})$ ,  $G(*\text{CO})$  on various of DACs and magnetic moments

| TM atoms | $G(*\text{COOH})$ (eV) | Magnetic moment<br>( $\mu_B$ ) | $G(*\text{CO})$ (eV) | Magnetic moment<br>( $\mu_B$ ) |
|----------|------------------------|--------------------------------|----------------------|--------------------------------|
| CrFe     | 0.44                   | 0.98                           | -0.65                | 0.54                           |
| CrCo     | 0.29                   | 0.55                           | -0.75                | 2.00                           |
| CrNi     | 0.36                   | 3.48                           | -0.71                | 2.64                           |
| CrCu     | 0.19                   | 2.60                           | -0.06                | 2.17                           |
| MnFe     | -0.09                  | 4.57                           | -1.07                | 4.75                           |
| MnCo     | 0.21                   | 3.32                           | -1.01                | 1.66                           |
| MnNi     | 0.52                   | 2.32                           | -0.35                | 2.50                           |
| MnCu     | 0.24                   | 2.36                           | -0.38                | 2.08                           |
| FeFe     | -0.25                  | 3.21                           | -1.01                | 1.37                           |
| FeCo     | 0.39                   | 2.73                           | -0.79                | 2.32                           |
| FeNi     | 0.32                   | 1.55                           | -0.81                | 1.40                           |
| FeCu     | 0.05                   | 0.24                           | -0.74                | 0.47                           |
| CoCo     | 0.07                   | 1.52                           | -1.27                | 0.00                           |
| CoNi     | 0.26                   | 0.00                           | -0.87                | 0.00                           |
| CoCu     | 0.10                   | 0.00                           | -0.53                | 0.00                           |
| NiNi     | 1.02                   | 0.00                           | 0.17                 | 0.00                           |
| NiCu     | 0.80                   | 0.50                           | 0.03                 | 1.08                           |
| CuCu     | 1.15                   | 0.66                           | 0.19                 | 0.04                           |

**Table S5.** Values of G(\*CHO), G(\*COH) on various of DACs and magnetic moments

| TM atoms | G(*CHO) (eV) | Magnetic moment<br>( $\mu_B$ ) | G(*COH) (eV) | Magnetic moment<br>( $\mu_B$ ) |
|----------|--------------|--------------------------------|--------------|--------------------------------|
| CrFe     | 0.74         | 0.72                           | 0.56         | 1.54                           |
| CrCo     | 0.64         | 0.02                           | 0.31         | 2.67                           |
| CrNi     | 0.57         | 1.59                           | 0.81         | 2.03                           |
| CrCu     | 0.52         | 2.47                           | 1.31         | 1.13                           |
| MnFe     | -0.08        | 4.64                           | -0.03        | 2.56                           |
| MnCo     | 0.46         | 3.11                           | 0.31         | 2.12                           |
| MnNi     | 0.68         | 2.11                           | 1.17         | 1.35                           |
| MnCu     | 0.37         | 2.12                           | 1.22         | 1.43                           |
| FeFe     | -0.07        | 3.20                           | 0.28         | 2.08                           |
| FeCo     | 0.59         | 2.63                           | 0.50         | 0.80                           |
| FeNi     | 0.46         | 1.51                           | 0.68         | 0.00                           |
| FeCu     | 0.21         | 0.49                           | 1.05         | 0.00                           |
| CoCo     | 0.18         | 1.47                           | 0.03         | 0.00                           |
| CoNi     | 0.29         | 0.00                           | 0.99         | 0.20                           |
| CoCu     | 0.15         | 0.00                           | 1.49         | 0.00                           |
| NiNi     | 0.50         | 0.00                           | 2.11         | 1.63                           |
| NiCu     | 0.72         | 0.49                           | 2.14         | 0.00                           |
| CuCu     | 1.26         | 0.00                           | 2.42         | 0.00                           |

**Table S6.** Values of  $G(*\text{CO-CO})$ ,  $G(*\text{CO-CHO})$  and  $G(*\text{CO-COH})$  on various of DACs and magnetic moments

| TM atoms | $G(*\text{CO-CO})$<br>(eV) | Magnetic<br>moment ( $\mu_B$ ) | $G(*\text{CO-CHO})$<br>(eV) | Magnetic<br>moment ( $\mu_B$ ) | $G(*\text{CO-COH})$<br>(eV) | Magnetic<br>moment<br>( $\mu_B$ ) |
|----------|----------------------------|--------------------------------|-----------------------------|--------------------------------|-----------------------------|-----------------------------------|
| CrFe     | -0.94                      | 1.56                           | -0.30                       | 0.31                           | 0.11                        | 0.11                              |
| CrCo     | -1.15                      | 1.81                           | -0.31                       | 1.50                           | -0.07                       | 1.08                              |
| CrNi     | -0.96                      | 1.49                           | -0.05                       | 1.53                           | 0.45                        | 1.25                              |
| CrCu     | -0.57                      | 1.09                           | 0.48                        | 1.70                           | 0.80                        | 0.25                              |
| MnFe     | -1.33                      | 1.82                           | -1.08                       | 2.67                           | -0.01                       | 1.27                              |
| MnCo     | -1.15                      | 1.14                           | -0.27                       | 1.45                           | -0.32                       | 0.00                              |
| MnNi     | -0.72                      | 0.00                           | 0.26                        | 1.31                           | 0.83                        | 0.00                              |
| MnCu     | -0.85                      | 0.00                           | 0.23                        | 0.88                           | 0.73                        | 0.00                              |
| FeFe     | -1.15                      | 0.72                           | -0.75                       | 1.58                           | 0.32                        | 1.16                              |
| FeCo     | -0.89                      | 0.00                           | -0.41                       | 0.42                           | 0.64                        | 0.48                              |
| FeNi     | -1.36                      | 0.00                           | -0.25                       | 0.00                           | 0.58                        | 0.00                              |
| FeCu     | -1.10                      | 0.24                           | -0.07                       | 0.00                           | 0.93                        | 0.73                              |
| CoCo     | -0.92                      | 0.06                           | -0.93                       | 0.00                           | -0.06                       | 0.00                              |
| CoNi     | -0.72                      | 0.95                           | 0.00                        | 0.00                           | 0.66                        | 0.35                              |
| CoCu     | -0.45                      | 0.47                           | 0.14                        | 0.95                           | 1.75                        | 0.23                              |
| NiNi     | 0.70                       | 1.70                           | 0.91                        | 0.64                           | 1.39<br>(*COCOH)            | 0.00                              |
| NiCu     | 0.26                       | 0.99                           | 1.17                        | 1.05                           | 1.81<br>(*COCOH)            | 1.70                              |
| CuCu     | 0.14                       | 0.00                           | 1.21                        | 0.00                           | 1.49<br>(*COCOH)            | 0.69                              |

**Table S7.** Values of  $G(*\text{COCO})$ ,  $G(*\text{COCHO})$  and  $G(*\text{COCOH})$  on various of DACs and magnetic moments

| TM atoms | $G(*\text{COCO})$<br>(eV) | Magnetic<br>moment ( $\mu_B$ ) | $G(*\text{COCHO})$<br>(eV) | Magnetic<br>moment ( $\mu_B$ ) | $G(*\text{COCOH})$<br>(eV) | Magnetic<br>moment ( $\mu_B$ ) |
|----------|---------------------------|--------------------------------|----------------------------|--------------------------------|----------------------------|--------------------------------|
| CrFe     | -0.12                     | 0.00                           | -0.11                      | 0.76                           | 0.19                       | 0.00                           |
| CrCo     | 1.02                      | 0.34                           | 0.19                       | 0.35                           | -0.05                      | 0.98                           |
| CrNi     | 0.94                      | 0.96                           | 0.47                       | 1.14                           | 0.11                       | 1.82                           |
| CrCu     | 0.98                      | 1.83                           | 0.37                       | 2.29                           | 0.66                       | 2.54                           |
| MnFe     | -0.37                     | 0.73                           | -0.25                      | 4.44                           | 0.07                       | 0.68                           |
| MnCo     | -0.11                     | 2.51                           | 0.16                       | 2.82                           | 0.22                       | 1.84                           |
| MnNi     | 0.59                      | 2.10                           | 0.60                       | 2.03                           | 0.97                       | 2.62                           |
| MnCu     | 1.03                      | 2.11                           | 0.21                       | 2.01                           | 0.60                       | 3.12                           |
| FeFe     | -0.26                     | 2.28                           | -0.23                      | 2.83                           | -0.11                      | 1.88                           |
| FeCo     | 0.05                      | 1.75                           | 0.22                       | 2.44                           | 0.27                       | 1.11                           |
| FeNi     | -1.36<br>(*CO-CO)         | 0.00                           | 0.36                       | 1.46                           | 0.75                       | 0.00                           |
| FeCu     | 0.03                      | 0.00                           | 0.08                       | 0.37                           | 0.58                       | 1.95                           |
| CoCo     | -0.29                     | 0.00                           | 0.01                       | 1.26                           | -0.24                      | 0.00                           |
| CoNi     | 0.12                      | 0.00                           | -0.10                      | 0.00                           | 0.97                       | 0.00                           |
| CoCu     | 0.50                      | 0.27                           | 0.07                       | 0.00                           | 1.15                       | 0.00                           |
| NiNi     | 1.17                      | 0.44                           | 0.47                       | 0.00                           | 1.39                       | 0.00                           |
| NiCu     | 1.46                      | 0.00                           | 0.98                       | 0.00                           | 1.81                       | 1.70                           |
| CuCu     | 0.66                      | 0.00                           | 1.20                       | 0.39                           | 1.86                       | 0.69                           |



**Table S8.** Values of  $G(^*COCH_2O)$ ,  $G(^*COHCHO)$ ,  $G(^*COHCH_2O)$ ,  $G(^*CHOHCH_2O)$ ,  $G(^*CHCH_2O)$ ,  $G(^*CH_2CH_2O)$ ,  $G(^*CH_2CH_2OH)$ ,  $G(^*CH_2CH_2OH)$  and  $G(^*O)$  on various of DACs and magnetic moments

| TM atoms | $G(^*C$<br>OCH <sub>2</sub><br>O)<br>(eV) | Magne<br>tic<br>mome<br>nt ( $\mu_B$ ) | $G(^*C$<br>OHCH<br>O)<br>(eV) | Magne<br>tic<br>mome<br>nt ( $\mu_B$ ) | $G(^*C$<br>OHCH<br><sub>2</sub> O)<br>(eV) | Magne<br>tic<br>mome<br>nt ( $\mu_B$ ) | $G(^*C$<br>HOHC<br>H <sub>2</sub> O)<br>(eV) | Magne<br>tic<br>mome<br>nt ( $\mu_B$ ) | $G(^*C$<br>HCH <sub>2</sub><br>O)<br>(eV) | Magne<br>tic<br>mome<br>nt ( $\mu_B$ ) | $G(^*C$<br>H <sub>2</sub> CH <sub>2</sub><br>O)<br>(eV) | Magne<br>tic<br>mome<br>nt ( $\mu_B$ ) | $G(^*C$<br>H <sub>2</sub> CH <sub>2</sub><br>OH)<br>(eV) | Magne<br>tic<br>mome<br>nt ( $\mu_B$ ) | $G(^*C$<br>H <sub>3</sub> CH <sub>2</sub><br>O)<br>(eV) | Magne<br>tic<br>mome<br>nt ( $\mu_B$ ) | $G(^*O)$<br>(eV) | Magne<br>tic<br>mome<br>nt ( $\mu_B$ ) |
|----------|-------------------------------------------|----------------------------------------|-------------------------------|----------------------------------------|--------------------------------------------|----------------------------------------|----------------------------------------------|----------------------------------------|-------------------------------------------|----------------------------------------|---------------------------------------------------------|----------------------------------------|----------------------------------------------------------|----------------------------------------|---------------------------------------------------------|----------------------------------------|------------------|----------------------------------------|
| CrFe     | -0.47                                     | 0.84                                   | -0.40                         | 0.79                                   | -0.14                                      | 1.58                                   | 0.17                                         | 0.00                                   | 0.04                                      | 0.00                                   | -0.60                                                   | 0.00                                   | -1.60                                                    | 0.54                                   | -2.35                                                   | 0.32                                   | -2.15            | 0.69                                   |
| CrCu     | 0.72                                      | 2.99                                   | 0.21                          | 1.77                                   | 1.02                                       | 1.89                                   | 0.00                                         | 1.93                                   | 0.55                                      | 2.45                                   | -0.87                                                   | 2.01                                   | -1.26                                                    | 2.65                                   | -2.00                                                   | 2.69                                   | -1.51            | 1.68                                   |
| MnCu     | 0.62                                      | 2.21                                   | 0.57                          | 1.67                                   | 1.12                                       | 1.62                                   | 0.59                                         | 2.52                                   | 0.79                                      | 1.49                                   | 0.01                                                    | 2.49                                   | -1.20                                                    | 2.93                                   | -1.96                                                   | 3.47                                   | -1.01            | 2.74                                   |
| FeFe     | -0.44                                     | 3.63                                   | -0.22                         | 2.44                                   | -0.14                                      | 3.45                                   | -0.31                                        | 4.07                                   | -0.42                                     | 3.48                                   | -0.96                                                   | 4.06                                   | -1.41                                                    | 3.32                                   | -1.90                                                   | 5.01                                   | -1.51            | 3.30                                   |
| FeCo     | 0.34                                      | 3.16                                   | 0.50                          | 2.46                                   | 0.80                                       | 2.45                                   | 0.39                                         | 3.13                                   | 0.52                                      | 2.63                                   | -0.27                                                   | 3.20                                   | -0.86                                                    | 3.26                                   | -1.67                                                   | 1.36                                   | -1.02            | 0.60                                   |
| CoNi     | 0.39                                      | 0.81                                   | 0.69                          | 1.51                                   | 1.17                                       | 0.64                                   | 0.55                                         | 0.86                                   | 1.01                                      | 0.64                                   | 0.02                                                    | 1.00                                   | -0.90                                                    | 0.00                                   | -1.35                                                   | 0.83                                   | -0.65            | 0.94                                   |
| CoCu     | 0.45                                      | 0.00                                   | 0.65                          | 1.05                                   | 1.29                                       | 0.00                                   | 0.61                                         | 0.00                                   | 1.14                                      | 0.00                                   | 0.12                                                    | 0.00                                   | -1.14                                                    | 0.00                                   | -1.17                                                   | 1.02                                   | -0.20            | 2.00                                   |
| NiCu     | 0.97                                      | 0.00                                   | 1.32                          | 2.50                                   | 1.92                                       | 1.72                                   | 1.14                                         | 1.08                                   | 1.87                                      | 1.70                                   | 0.85                                                    | 0.00                                   | -0.51                                                    | 0.64                                   | -0.78                                                   | 0.59                                   | 0.38             | 1.09                                   |

**Table S9.** Values of adsorbed species on Co-Co and magnetic moments

|                                        | Adsorbed species<br>(eV) | Magnetic moment<br>( $\mu_B$ ) |
|----------------------------------------|--------------------------|--------------------------------|
| G(*COHCOH)                             | 0.78                     | 0.00                           |
| G(*CCO)                                | -0.30                    | 0.73                           |
| G(*CHCO)                               | -0.96                    | 0.00                           |
| G(*CCOH)                               | 0.46                     | 1.08                           |
| G(*CH <sub>2</sub> CO)                 | -1.23                    | 0.00                           |
| G(*CHCOH)                              | 0.02                     | 0.00                           |
| G(*CH <sub>2</sub> COH)                | -0.97                    | 0.00                           |
| G(*CH <sub>2</sub> CHOH)               | -1.22                    | 0.00                           |
| G(*CH <sub>2</sub> CH <sub>2</sub> OH) | -1.03                    | 1.88                           |
| G(*O)                                  | -1.31                    | 1.07                           |
